# Supplementary material for: Pattern of vitreo-retinal diseases at the national referral hospital in Bhutan: a retrospective, hospital-based study
Source: Springer Nature journal article supplement (doi:10.1186/s12886-020-01335-x), 2020-02-13

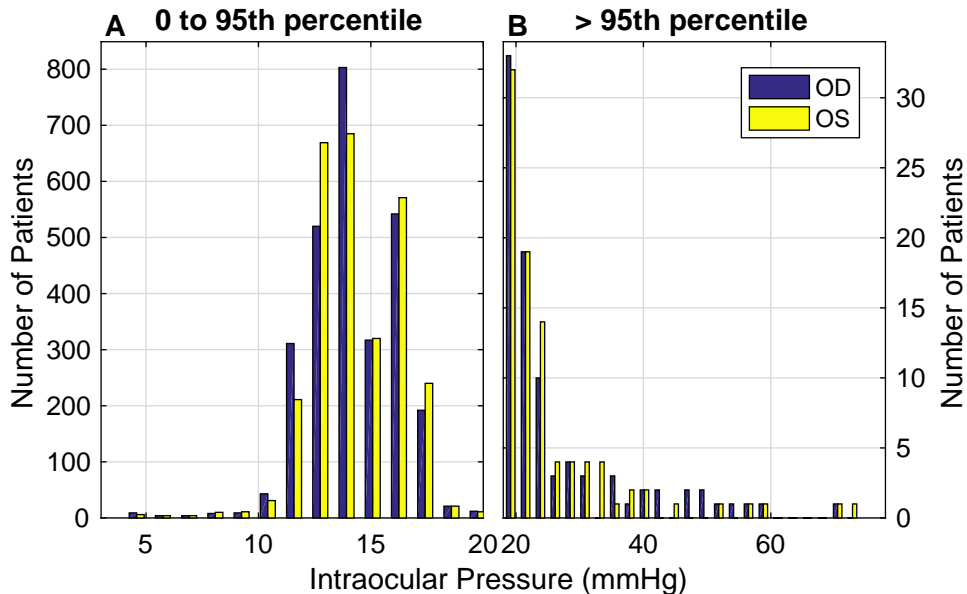

Supplement: MOESM3 [file 17698682]
